# Supplementary material for: Unprecedented synthesis of a novel amino quinone ring system via oxidative decarboxylation of quinone-based α,α-amino esters
Source: Royal Society of Chemistry journal article supplement (doi:10.1039/b918898c), 2009-12-08
Supplement: b918898c.pdf [file b918898c.pdf]

## **Unprecedented synthesis of a novel amino quinone ring system *via* oxidative decarboxylation of quinone-based $\alpha,\alpha$ -amino esters**

Pietro Campiglia,<sup>a</sup> Claudio Aquino,<sup>b</sup> Alessia Bertamino,<sup>b</sup> Nicoletta De Simone,<sup>b</sup> Marina Sala,<sup>b</sup> Sabrina Castellano,<sup>a</sup> Marisabella Santoriello,<sup>a</sup> Paolo Grieco,<sup>b</sup> Ettore Novellino,<sup>b</sup> Isabel M. Gomez-Monterrey,<sup>\* b</sup>

### **Supporting Information**

#### **Contents**

<sup>1</sup>H NMR and <sup>13</sup>C NMR for compounds **3**, **5**, **7a**, **7b** and **12**.

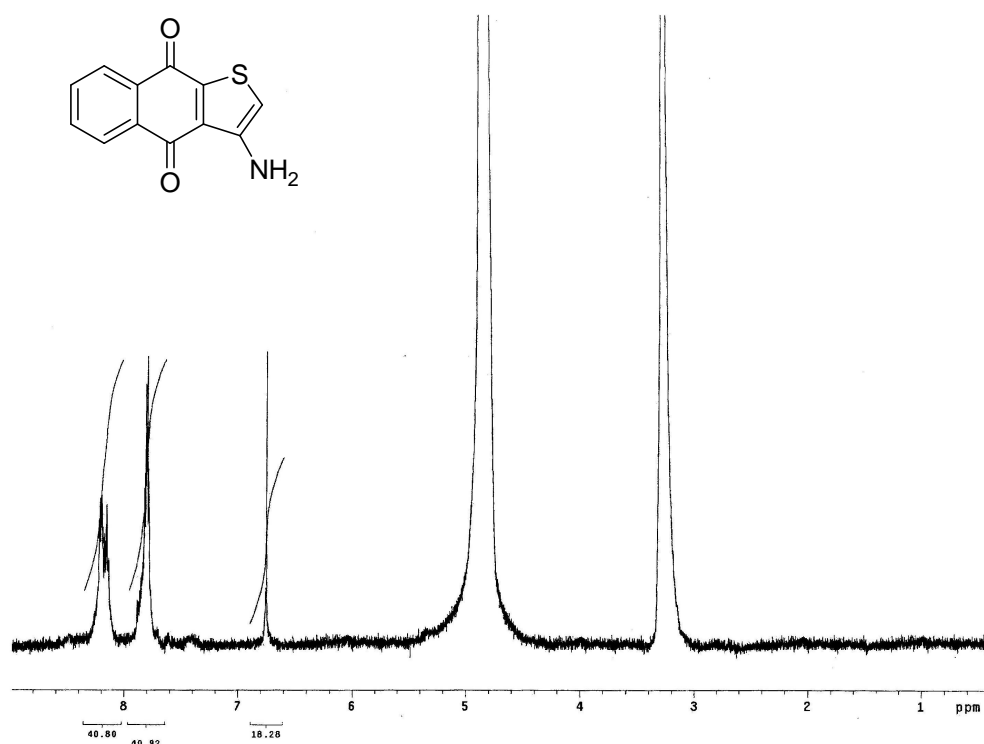

Figure 1.  $^1\text{H}$  NMR of compound **3**

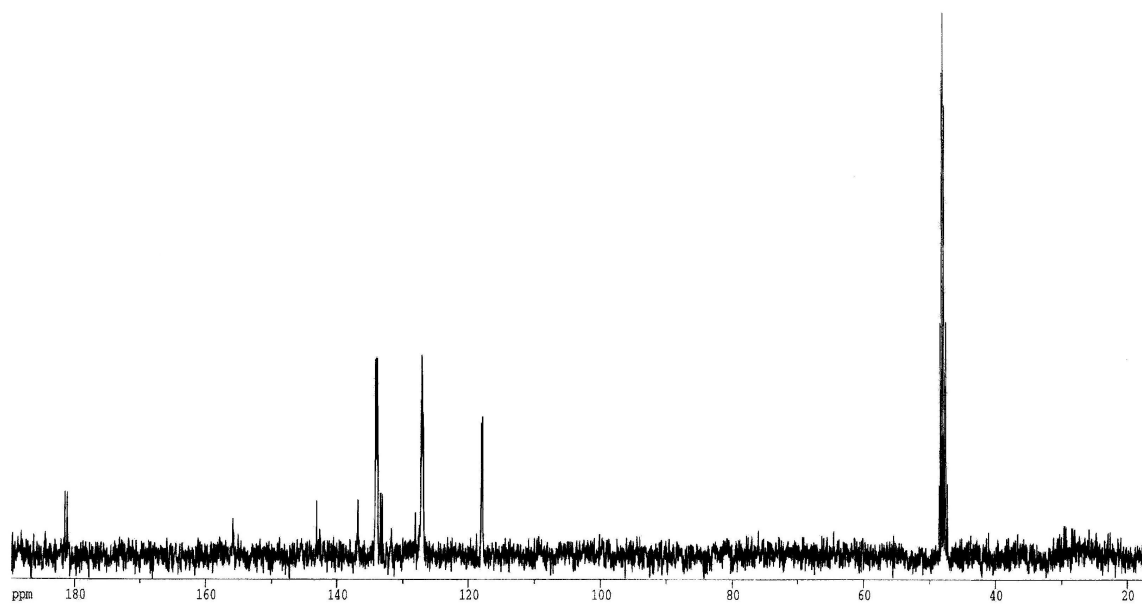

Figure 2.  $^{13}\text{C}$  NMR of compound 3

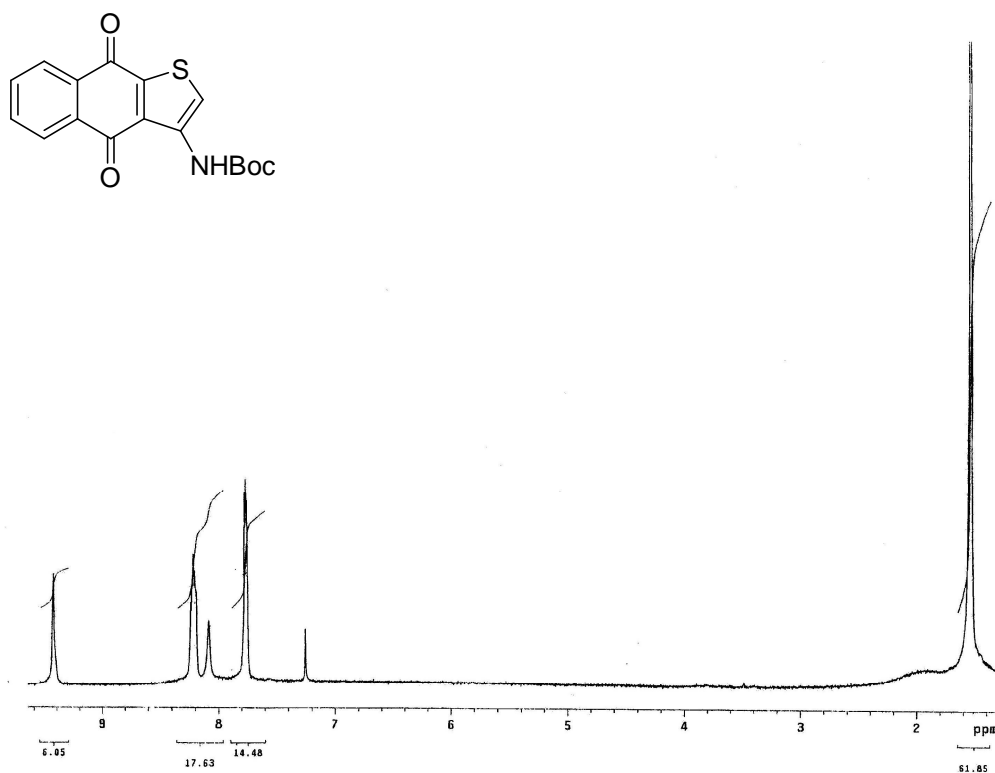

Figure 3.  $^1\text{H}$  NMR of compound 5

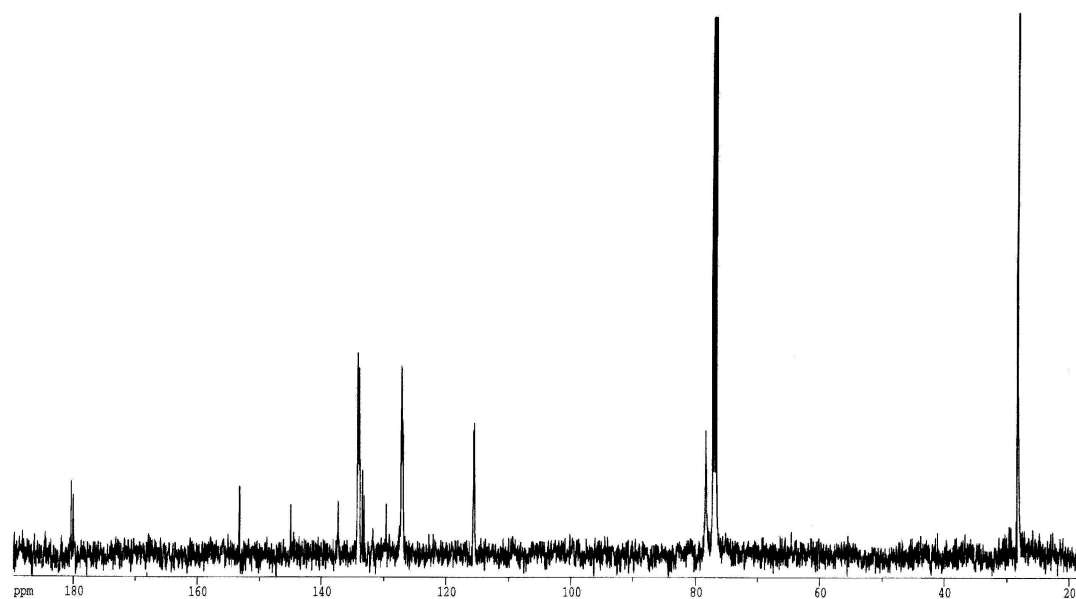

Figure 4.  $^{13}\text{C}$  NMR of compound **5**

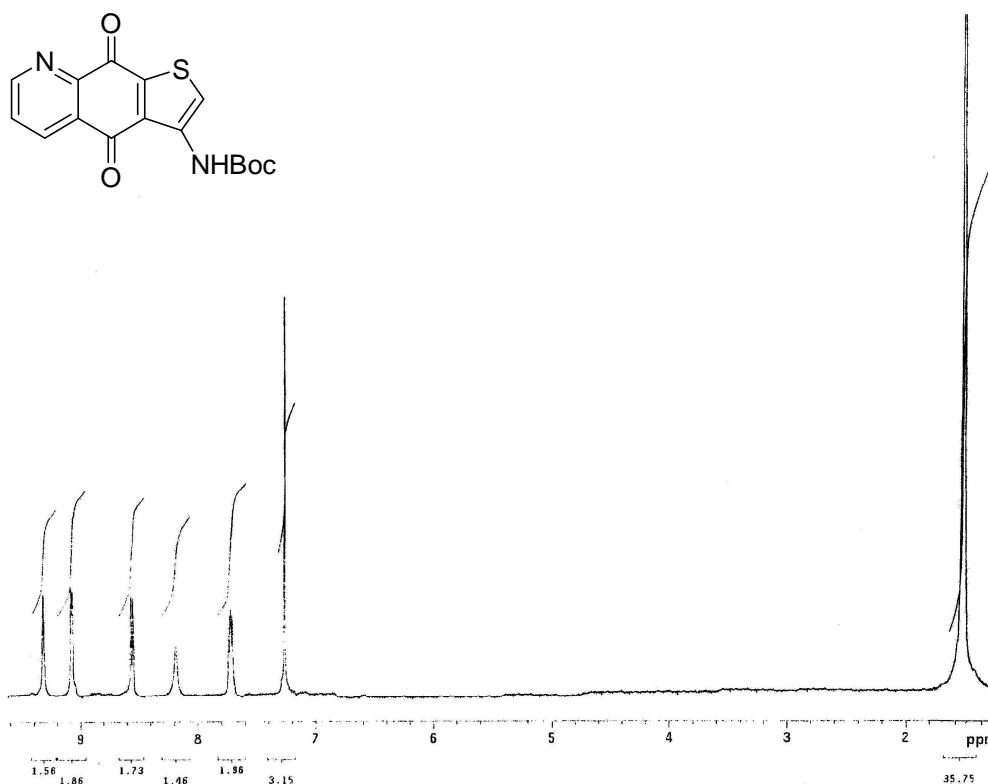

Figure 5.  $^1\text{H}$  NMR of compound **7a**

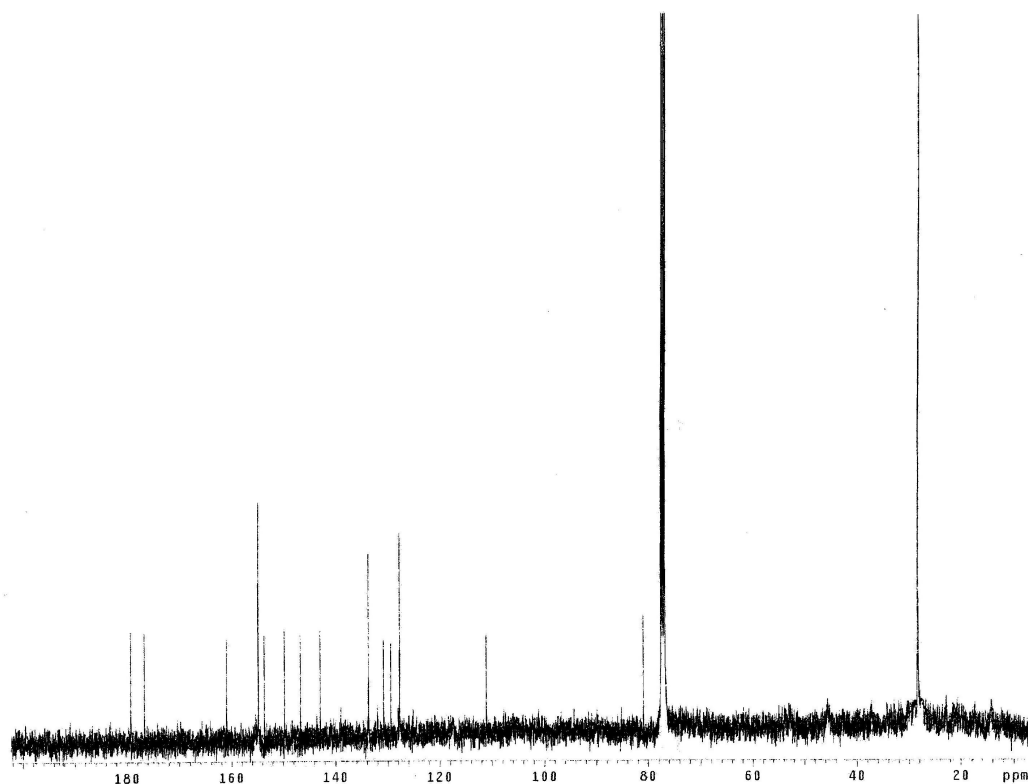

Figure 6.  $^{13}\text{C}$  NMR of compound **7a**

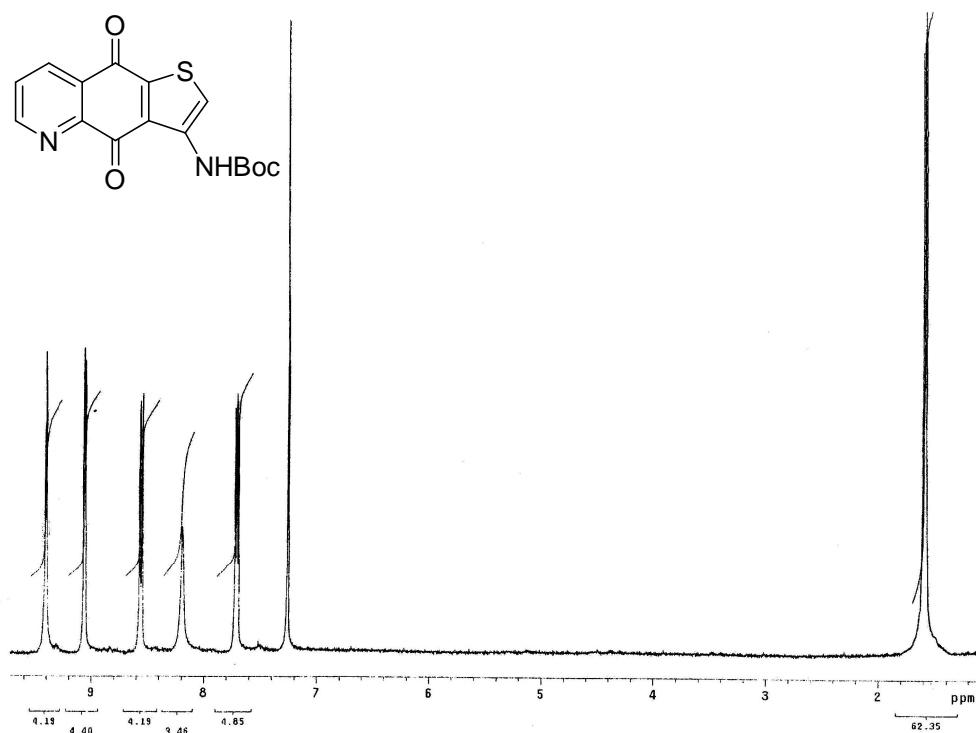

Figure 7.  $^1\text{H}$  NMR of compound **7b**

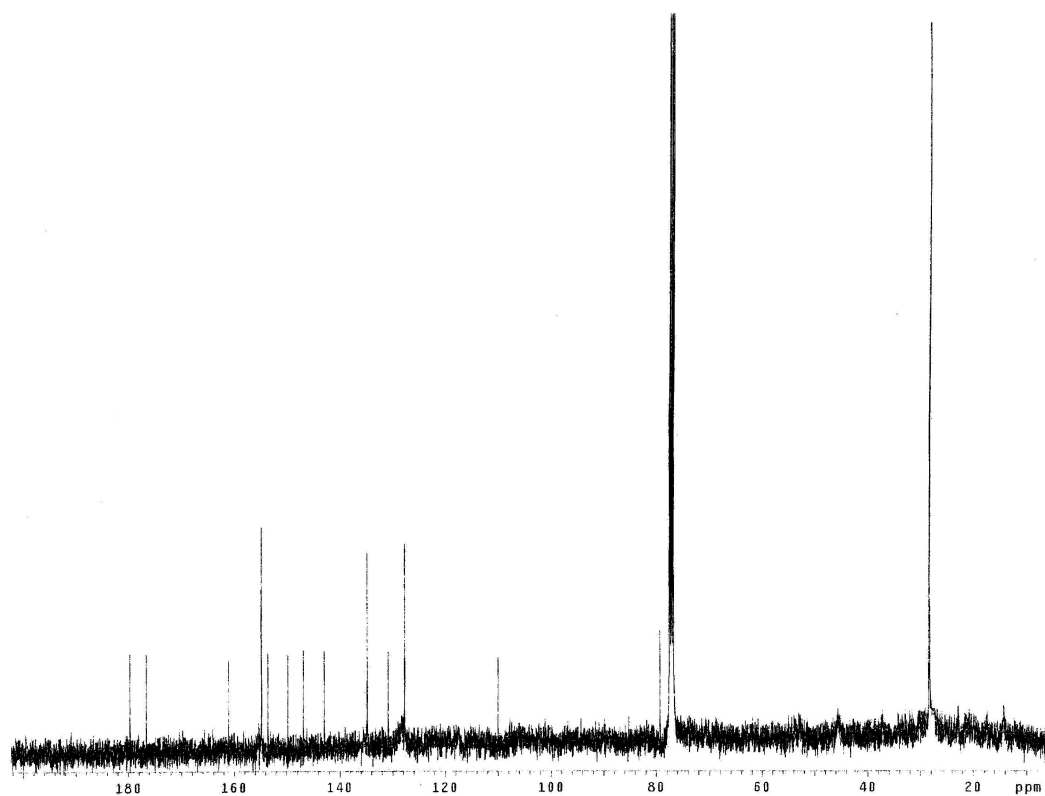

Figure 8.  $^{13}\text{C}$  NMR of compound **7b**

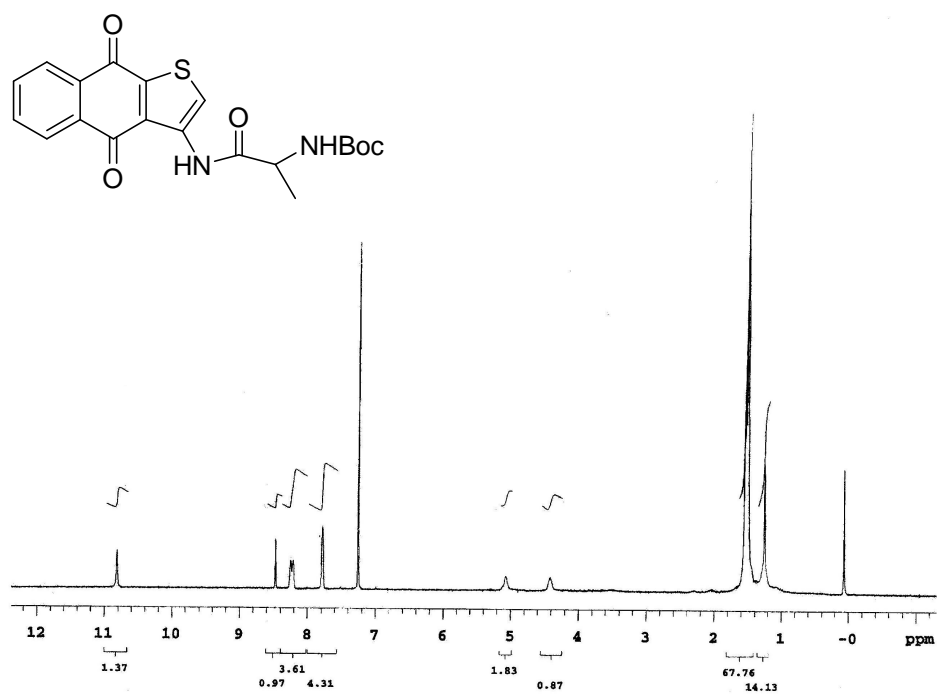

Figure 9.  $^1\text{H}$  NMR of compound **12**

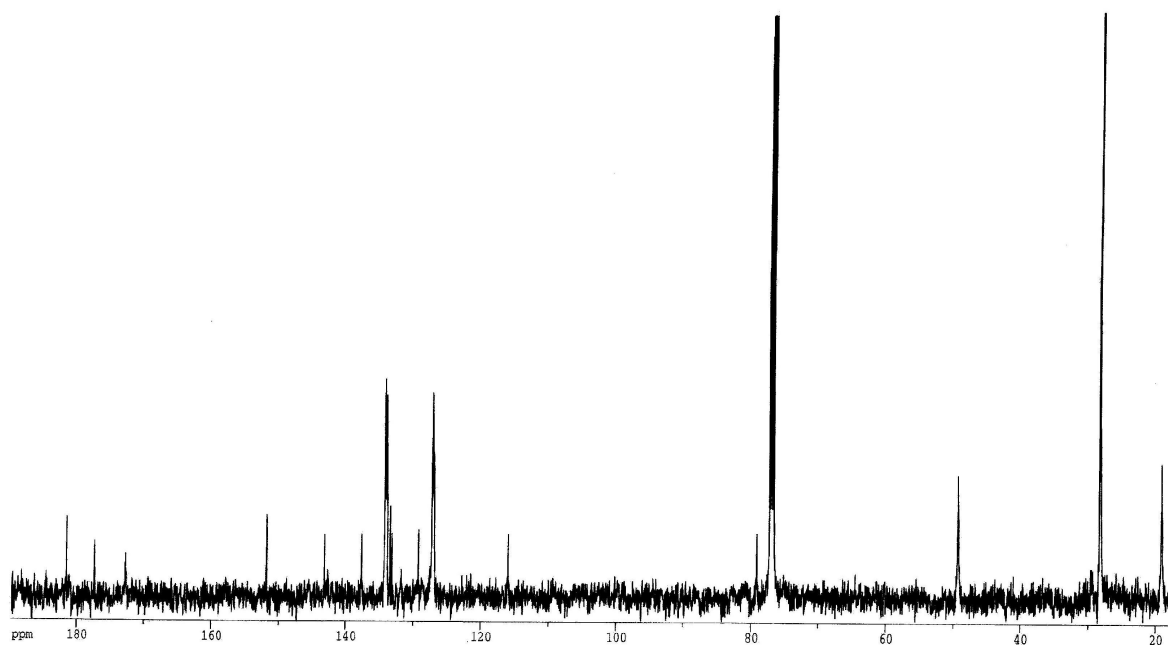

Figure 10.  $^{13}\text{C}$  NMR of compound **12**
